# Supplementary material for: Dietary Patterns and Factors Associated with Food Affinity in Pregnant Women from Quito, Ecuador
Source: MDPI journal article supplement (doi:10.3390/nu16040475), 2024-02-07
Supplement: s1 [file s1]

**Table S1.** Degree of affinity with nutritional patterns by sociodemographic and lifestyle factors in Quito in 2023 (n = 535)

| Variables                             | N   | Dairy, salads, and sweet snacks/dressings |                          |                        |       | Refined carbohydrates |                          |                        |      | Traditional Ecuadorian |                          |                        |      |
|---------------------------------------|-----|-------------------------------------------|--------------------------|------------------------|-------|-----------------------|--------------------------|------------------------|------|------------------------|--------------------------|------------------------|------|
|                                       |     | Low affinity<br>n (%)                     | Medium affinity<br>n (%) | High affinity<br>n (%) | p     | Low affinity<br>n (%) | Medium affinity<br>n (%) | High affinity<br>n (%) | p    | Low affinity<br>n (%)  | Medium affinity<br>n (%) | High affinity<br>n (%) | p    |
| Nationality                           |     |                                           |                          |                        |       |                       |                          |                        |      |                        |                          |                        |      |
| Ecuadorian                            | 506 | 276 (54.5)                                | 22 (43.9)                | 8 (1.6)                | <0.01 | 184 (36.4)            | 260 (51.4)               | 62 (12.3)              | 0.65 | 79 (15.6)              | 347 (68.6)               | 80 (15.8)              | 0.39 |
| Foreign                               | 29  | 8 (27.6)                                  | 18 (62.1)                | 3 (10.3) <sup>+</sup>  |       | 12 (41.4)             | 15 (51.7)                | 2 (6.9)                |      | 2 (6.9)                | 21 (72.4)                | 6 (20.7)               |      |
| Region of origin in Ecuador (n = 506) |     |                                           |                          |                        |       |                       |                          |                        |      |                        |                          |                        |      |
| The highlands (Sierra)                | 440 | 242 (55)                                  | 191 (43.4)               | 7 (1.6) <sup>+</sup>   | <0.01 | 157 (35.7)            | 277 (51.6)               | 56 (12.7)              | 0.48 | 74 (16.8)              | 301 (68.4)               | 65 (14.8)              | 0.04 |
| Coast (costa)                         | 55  | 29 (52.7)                                 | 25 (45.5)                | 1 (1.8) <sup>+</sup>   |       | 25 (45.5)             | 24 (43.6)                | 6 (10.9)               |      | 3 (5.5)                | 38 (69.1)                | 14 (25.5) <sup>+</sup> |      |
| Eastern region (Oriente)              | 10  | 4 (40)                                    | 6 (60)                   | 0 (0)                  |       | 2 (20)                | 8 (80)                   | 0 (0)                  |      | 1 (10)                 | 8 (80)                   | 1 (10)                 |      |
| Galápagos Islands (Insular)           | 1   | 1 (100)                                   | 0 (0)                    | 0 (0)                  |       | 0 (0)                 | 1 (100)                  | 0 (0)                  |      | 1 (100)                | 0 (0)                    | 0 (0)                  |      |
| Age                                   |     |                                           |                          |                        |       |                       |                          |                        |      |                        |                          |                        |      |
| < 20 years                            | 50  | 29 (58)                                   | 21 (42)                  | 0 (0)                  | 0.65  | 20 (40)               | 22 (44)                  | 8 (16)                 | 0.78 | 10 (20)                | 31 (62)                  | 9 (18)                 | 0.81 |
| 20-35 years                           | 403 | 214 (53.1)                                | 179 (44.4)               | 10 (2.5)               |       | 148 (36.7)            | 209 (51.9)               | 46 (11.4)              |      | 58 (14.4)              | 280 (69.5)               | 65 (16.1)              |      |
| > 35 years                            | 82  | 41 (50)                                   | 40 (48.8)                | 1 (1.2)                |       | 28 (34.1)             | 44 (53.7)                | 10 (12.2)              |      | 13 (15.9)              | 57 (69.5)                | 12 (14.6)              |      |
| Lives with a partner                  |     |                                           |                          |                        |       |                       |                          |                        |      |                        |                          |                        |      |
| Yes                                   | 449 | 246 (54.8)                                | 194 (43.2)               | 9 (2)                  | 0.19  | 166 (37)              | 231 (51.4)               | 52 (11.6)              | 0.80 | 67 (14.9)              | 313 (69.7)               | 69 (15.4)              | 0.52 |
| No                                    | 86  | 38 (44.2)                                 | 46 (53.5)                | 2 (2.3)                |       | 30 (34.9)             | 44 (51.2)                | 12 (14)                |      | 14 (16.3)              | 64 (55)                  | 17 (19.8)              |      |
| Ethnicity                             |     |                                           |                          |                        |       |                       |                          |                        |      |                        |                          |                        |      |
| Mestiza                               | 479 | 260 (54.3)                                | 211 (44.1)               | 8 (1.7)                | <0.01 | 171 (35.7)            | 248 (51.8)               | 60 (12.5)              | 0.53 | 69 (14.4)              | 333 (69.5)               | 77 (16.1)              | 0.82 |

[illegible]

|                                   |     |               |            |          |      |               |            |           |      |           |            |                       |      |
|-----------------------------------|-----|---------------|------------|----------|------|---------------|------------|-----------|------|-----------|------------|-----------------------|------|
| Yes                               | 221 | 111<br>(50.2) | 103 (43.6) | 7 (3.2)  | 0.20 | 93 (42.1)     | 105 (47.5) | 23 (10.4) | 0.08 | 28 (12.7) | 153 (69.2) | 40 (18.1)             | 0.29 |
| No                                | 314 | 173<br>(55.1) | 137 (43.6) | 4 (1.3)  |      | 103<br>(32.8) | 170 (54.1) | 41 (13.1) |      | 53 (16.9) | 215 (68.5) | 46 (14.6)             |      |
| Previous alcohol use              |     |               |            |          |      |               |            |           |      |           |            |                       |      |
| Yes                               | 77  | 43<br>(55.8)  | 33 (42.9)  | 1 (1.3)  | 0.90 | 31 (40.3)     | 39 (50.6)  | 7 (9.1)   | 0.62 | 10 (13)   | 52 (67.5)  | 15 (19.5)             | 0.61 |
| No                                | 458 | 241<br>(52.6) | 207 (45.2) | 10 (2.2) |      | 165 (36)      | 236 (51.5) | 57 (12.4) |      | 71 (15.5) | 316 (69)   | 71 (15.5)             |      |
| Previous tobacco use              |     |               |            |          |      |               |            |           |      |           |            |                       |      |
| Yes                               | 24  | 14<br>(58.3)  | 9 (37.5)   | 1 (4.2)  | 0.61 | 6 (25)        | 14 (58.3)  | 4 (16.7)  | 0.44 | 3 (12.5)  | 12 (50)    | 9 (37.5) <sup>+</sup> | 0.01 |
| No                                | 511 | 270<br>(52.8) | 231 (45.2) | 10 (2)   |      | 190<br>(37.2) | 261 (51.1) | 60 (11.7) |      | 78 (15.3) | 356 (69.7) | 77 (15.1)             |      |
| Current exposure to tobacco smoke |     |               |            |          |      |               |            |           |      |           |            |                       |      |
| Yes                               | 29  | 16<br>(55.2)  | 12 (41.4)  | 1 (3.4)  | 0.81 | 11 (37.9)     | 15 (51.7)  | 3 (10.3)  | 0.95 | 5 (17.2)  | 19 (65.5)  | 5 (17.2)              | 0.92 |
| No                                | 506 | 268 (53)      | 228 (41.4) | 10 (2)   |      | 185<br>(36.6) | 260 (51.4) | 61 (12.1) |      | 76 (15)   | 349 (69)   | 81 (16)               |      |
| Physical activity                 |     |               |            |          |      |               |            |           |      |           |            |                       |      |
| Active                            | 256 | 140<br>(54.7) | 112 (43.8) | 4 (1.6)  | 0.62 | 97 (37.9)     | 130 (50.8) | 29 (11.3) | 0.81 | 40 (15.6) | 180 (70.3) | 36 (14.1)             | 0.47 |
| Inactive                          | 279 | 144<br>(51.6) | 128 (45.9) | 7 (2.5)  |      | 99 (35.5)     | 145 (52)   | 35 (12.5) |      | 41 (14.7) | 188 (67.4) | 50 (17.9)             |      |
| Sedentary behaviour               |     |               |            |          |      |               |            |           |      |           |            |                       |      |
| < 4 hours                         | 385 | 211<br>(54.8) | 169 (43.9) | 5 (1.3)  | 0.08 | 141<br>(36.6) | 199 (51.7) | 45 (11.7) | 0.94 | 55 (14.3) | 264 (68.6) | 66 (17.1)             | 0.43 |
| > 4 hours                         | 150 | 73<br>(48.7)  | 71 (47.3)  | 6 (4)    |      | 55 (36.7)     | 76 (50.7)  | 19 (12.7) |      | 26 (17.3) | 104 (69.3) | 20 (13.3)             |      |
| Previous pregnancies              |     |               |            |          |      |               |            |           |      |           |            |                       |      |
| Yes                               | 336 | 176<br>(52.4) | 153 (45.5) | 7 (2.1)  | 0.91 | 120<br>(35.7) | 177 (52.7) | 39 (11.6) | 0.74 | 61 (18.2) | 225 (67)   | 50 (14.9)             | 0.03 |

|                                               |     |               |            |          |      |               |            |           |      |           |            |                        |
|-----------------------------------------------|-----|---------------|------------|----------|------|---------------|------------|-----------|------|-----------|------------|------------------------|
| No                                            | 199 | 108<br>(54.3) | 87 (43.7)  | 4 (2)    |      | 76 (38.2)     | 98 (49.2)  | 25 (12.6) |      | 20 (10.1) | 143 (71.9) | 36 (18.1) <sup>+</sup> |
| Number of previous pregnancies (n = 336)      |     |               |            |          |      |               |            |           |      |           |            |                        |
| 1-3                                           | 312 | 163<br>(52.2) | 142 (45.5) | 7 (2.2)  | 0.75 | 108<br>(34.6) | 168 (53.8) | 36 (11.5) | 0.26 | 55 (17.6) | 212 (67.9) | 45 (14.4) 0.38         |
| ≥ 4                                           | 24  | 13<br>(54.2)  | 11 (45.8)  | 0 (0)    |      | 12 (50)       | 9 (37.5)   | 9 (12.5)  |      | 6 (25)    | 6 (54.2)   | 13 (20.8)              |
| BMI for gestational age at initial assessment |     |               |            |          |      |               |            |           |      |           |            |                        |
| Low                                           | 8   | 6 (75)        | 1 (12.5)   | 1 (12.5) | 0.22 | 5 (62.5)      | 1 (12.5)   | 2 (25)    | 0.31 | 2 (25)    | 4 (50)     | 2 (25) 0.64            |
| Normal                                        | 255 | 131<br>(51.4) | 120 (47.1) | 4 (1.6)  |      | 95 (37.3)     | 130 (51)   | 30 (11.8) |      | 40 (15.7) | 177 (69.4) | 38 (14.9)              |
| Overweight                                    | 196 | 106<br>(54.1) | 85 (43.4)  | 5 (2.6)  |      | 66 (33.7)     | 104 (53.1) | 26 (13.3) |      | 25 (12.8) | 140 (71.4) | 31 (15.8)              |
| Obesity                                       | 76  | 41<br>(53.9)  | 34 (44.7)  | 1 (1.3)  |      | 30 (39.5)     | 40 (52.6)  | 6 (7.9)   |      | 14 (18.4) | 47 (61.8)  | 15 (19.7)              |

<sup>+</sup>, High-affinity group

<, less than

>, greater than

≤, less than or equal to

<sup>++</sup>, Low-affinity group

≥, greater than or equal to

USD, US dollars.

Method: Test Chi-square.
